# Supplementary material
Source: Elsevier journal article supplement (https://www.sciencedirect.com/science/article/pii/S002175572200081X)
Supplement: mmc2 [file S002175572200081X:mmc2.pdf]

Porto Alegre, January 15, 2018

HOSPITAL DE CLÍNICAS DE PORTO ALEGRE

DIVISION OF RADIOLOGY

DIVISION OF PEDIATRIC SURGERY

RESEARCH PROJECT:

**“Tumor resectability assessment: a comparison between ultrasound, tomography, and magnetic resonance imaging in a pediatric oncology population”**

The present study is completely retrospective. Data from patients operated on between January 2009 and December 2017 will be analyzed. All included patients have already undergone preoperative ultrasound, tomography, or magnetic resonance imaging and surgical treatment. No intervention will be undertaken. Data will be collected only by reviewing medical records. Because some patients eligible for the study have died, the researchers consider it not feasible to obtain informed consent from patients or their family members. Therefore, the researchers request a waiver of informed consent due to minimal risk of the study. The only possible risk of participating in the study is related to a breach of confidentiality. However, the researchers will use codes instead of the participants' names to avoid this risk.

Sincerely,

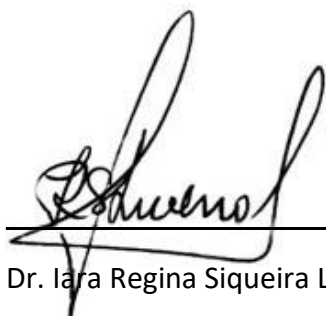

---

Dr. Iara Regina Siqueira Lucena,

Division of Radiology,

Hospital de Clínicas de Porto Alegre - UFRGS
